# Supplementary material for: Synergetic adsorption and photocatalytic degradation of pollutants over 3D TiO2—graphene aerogel composites synthesized via a facile one-pot route
Source: Royal Society of Chemistry journal article supplement (doi:10.1039/c6pp00133e), 2016-06-28
Supplement: c6pp00133e1.pdf [file c6pp00133e1.pdf]

**Synergetic Adsorption and Photocatalytic Degradation of  
Pollutants over 3D TiO<sub>2</sub>-Graphene Aerogel Composites  
Synthesized via a Facile One-Pot Route**

Jing-Jie Zhang<sup>a</sup>, Yu-Hui Wu<sup>a</sup>, Jin-Ya Mei<sup>a</sup>, Guang-Ping Zheng<sup>b</sup>, Ting-Ting Yan<sup>a</sup>,

Xiu-Cheng Zheng<sup>a\*</sup>, Pu Liu<sup>a</sup>, Xin-Xin Guan<sup>a\*</sup>

<sup>a</sup> College of Chemistry and Molecular Engineering, Zhengzhou University,

Zhengzhou 450001, China

<sup>b</sup> Department of Mechanical Engineering, The Hong Kong Polytechnic University,

Hong Kong, China

\*Corresponding author: E-mail address: zhxch@zzu.edu.cn (X.C. Zheng);

guanxin@zzu.edu.cn (X.X. Guan).

This supporting information includes:

Fig. S1

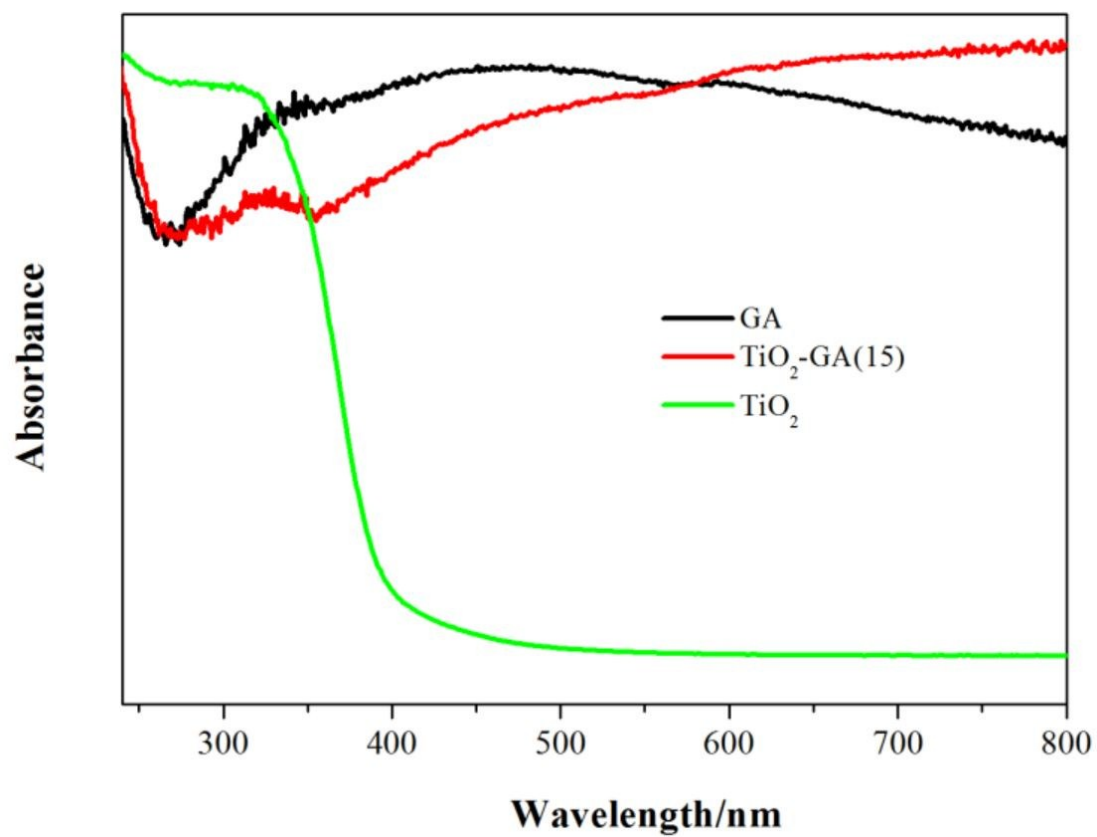

**Fig. S1** DR UV-Vis spectra of pristine GA, TiO<sub>2</sub>, and TiO<sub>2</sub>-GA(15) composites.
